# Supplementary material
Source: Springer Nature journal article supplement (https://www.springermedizin.de/resource/supplementary/12874_2001_6_MOESM3_ESM.pdf/9431996)
Supplement: MOESM3 [file 9431996]

**POST:** Pain score was 10 points lower in the treatment group

**FRACTION:** Pain fell by 40% in the treatment group but only 10% in controls

**CHANGE :** Pain fell by 15 points more in the treatment group

**ANCOVA:** After adjusting for baseline differences, pain fell by 15 points more in the treatment group.
